# Supplementary material
Source: PubMed Central journal article supplement (PMC9596487)
Supplement: 41416_2022_1915_MOESM3_ESM.pdf [file 41416_2022_1915_MOESM3_ESM.pdf]

**Supplementary Table 1 Comparison of somatic variants detected by target sequencing and by whole-exome sequencing (GRCh37/hg19)**

| DetectionType          | Sample name | Chr | Start     | Reference allele | Alternative allele | Gene          | Annotation          | VAF in target sequencing | Comment                                             |
|------------------------|-------------|-----|-----------|------------------|--------------------|---------------|---------------------|--------------------------|-----------------------------------------------------|
| Exome sequencing only  | KU22CR      | 3   | 37061889  | C                | T                  | <i>MLH1</i>   | nonsynonymous SNV   | 41.1                     | excluded by target sequencing with VAF 40-60%       |
| Exome sequencing only  | KU66        | 5   | 112175676 | AG               | -                  | <i>APC</i>    | frameshift deletion | 43.7                     | excluded by target sequencing with VAF 40-60%       |
| Exome sequencing only  | KU65        | 8   | 90967512  | T                | -                  | <i>NBN</i>    | frameshift deletion | 19.6                     | detected in 15 samples                              |
| Exome sequencing only  | KU13        | 11  | 108196929 | A                | C                  | <i>ATM</i>    | nonsynonymous SNV   | 48.3                     | excluded by target sequencing with VAF 40-60%       |
| Exome sequencing only  | KU22CR      | 12  | 58143257  | G                | C                  | <i>CDK4</i>   | nonsynonymous SNV   | 42.0                     | excluded by target sequencing with VAF 40-60%       |
| Exome sequencing only  | KU12        | 17  | 7578291   | T                | G                  | <i>TP53</i>   | splice-site variant | 49.1                     | excluded by target sequencing with VAF 40-60%       |
| Exome sequencing only  | KU25B       | 17  | 41234534  | T                | C                  | <i>BRCA1</i>  | nonsynonymous SNV   |                          | not detected by target sequencing                   |
| Exome sequencing only  | KU66        | 17  | 7577093   | C                | T                  | <i>TP53</i>   | nonsynonymous SNV   | 43.5                     | excluded by target sequencing with VAF 40-60%       |
| Common                 | KU26        | 5   | 112176046 | A                | -                  | <i>APC</i>    | frameshift deletion | 19.0                     |                                                     |
| Common                 | KU59        | 5   | 112151262 | G                | A                  | <i>APC</i>    | nonsynonymous SNV   | 27.7                     |                                                     |
| Common                 | KU61        | 5   | 112176863 | C                | T                  | <i>APC</i>    | stopgain            | 89.2                     |                                                     |
| Common                 | KU68        | 5   | 112175594 | A                | T                  | <i>APC</i>    | stopgain            | 82.4                     |                                                     |
| Common                 | KU22CR      | 7   | 6038813   | G                | A                  | <i>PMS2</i>   | stopgain            | 31.1                     |                                                     |
| Common                 | KU41        | 10  | 89692911  | G                | A                  | <i>PTEN</i>   | nonsynonymous SNV   | 30.7                     |                                                     |
| Common                 | KU64        | 10  | 89717705  | C                | T                  | <i>PTEN</i>   | nonsynonymous SNV   | 12.5                     |                                                     |
| Common                 | KU65        | 10  | 89717672  | C                | T                  | <i>PTEN</i>   | stopgain            | 26.5                     |                                                     |
| Common                 | KU66        | 10  | 89693003  | A                | -                  | <i>PTEN</i>   | frameshift deletion | 30.1                     |                                                     |
| Common                 | KU65        | 10  | 89717770  | A                | -                  | <i>PTEN</i>   | frameshift deletion | 24.6                     |                                                     |
| Common                 | KU66        | 10  | 89717770  | A                | -                  | <i>PTEN</i>   | frameshift deletion | 31.3                     |                                                     |
| Common                 | KU65        | 10  | 88677067  | C                | A                  | <i>BMPR1A</i> | synonymous SNV      | 32.8                     |                                                     |
| Common                 | KU14        | 11  | 108183170 | C                | G                  | <i>ATM</i>    | nonsynonymous SNV   | 37.4                     |                                                     |
| Common                 | KU44        | 16  | 68844112  | G                | A                  | <i>CDH1</i>   | nonsynonymous SNV   | 23.5                     |                                                     |
| Common                 | KU52        | 17  | 7577506   | C                | A                  | <i>TP53</i>   | nonsynonymous SNV   | 30.7                     |                                                     |
| Common                 | KU59        | 17  | 7578442   | T                | C                  | <i>TP53</i>   | nonsynonymous SNV   | 30.0                     |                                                     |
| Common                 | KU65        | 17  | 7577536   | T                | C                  | <i>TP53</i>   | nonsynonymous SNV   | 29.1                     |                                                     |
| Common                 | KU65        | 17  | 7578389   | G                | A                  | <i>TP53</i>   | nonsynonymous SNV   | 27.1                     |                                                     |
| Common                 | KU64        | 17  | 41247895  | C                | T                  | <i>BRCA1</i>  | nonsynonymous SNV   | 22.7                     |                                                     |
| Common                 | KU09        | 18  | 48604696  | G                | T                  | <i>SMAD4</i>  | synonymous SNV      | 23.0                     |                                                     |
| Common                 | KU09        | 18  | 48604697  | A                | G                  | <i>SMAD4</i>  | nonsynonymous SNV   | 23.3                     |                                                     |
| Target sequencing only | KU65        | 2   | 48027123  | T                | G                  | <i>MSH6</i>   | nonsynonymous SNV   | 27.8                     | germline in exome sequencing with matched leukocyte |
| Target sequencing only | KU26        | 9   | 21971122  | G                | A                  | <i>CDKN2A</i> | nonsynonymous SNV   | 65.2                     | germline in exome sequencing with matched leukocyte |

VAF: variant allele frequency;SNV: single nucleotide variant

**Supplementary Table 2 Tumor characteristics at CRPC diagnosis in the germline variant study (n = 549).**

| Factor                                   | Group | All patients      | Pathogenic germline <i>BRCA1</i> , <i>BRCA2</i> , <i>PALB2</i> or <i>ATM</i> mutations |                   |
|------------------------------------------|-------|-------------------|----------------------------------------------------------------------------------------|-------------------|
|                                          |       | n = 549           | yes<br>n = 29                                                                          | no<br>n = 520     |
| Acquisition of castration resistance (%) | no    | 82 (16.9)         | 2 (8.0)                                                                                | 80 (17.4)         |
|                                          | yes   | 404 (83.1)        | 23 (92.0)                                                                              | 381 (82.6)        |
|                                          | NA    | 63                | 4                                                                                      | 59                |
| PSA at CRPC (median [IQR]) (ng/mL)       |       | 3.16 [2.23, 6.68] | 3.17 [2.03, 10.25]                                                                     | 3.16 [2.23, 6.62] |
| Non-metastatic CRPC (%)                  | no    | 214 (80.8)        | 12 (85.7)                                                                              | 202 (80.5)        |
|                                          | yes   | 51 (19.2)         | 2 (14.3)                                                                               | 49 (19.5)         |
|                                          | NA    | 284               | 15                                                                                     | 269               |
| Lung metastasis at CRPC (%)              | no    | 241 (90.9)        | 13 (92.9)                                                                              | 228 (90.8)        |
|                                          | yes   | 24 (9.1)          | 1 (7.1)                                                                                | 23 (9.2)          |
|                                          | NA    | 284               | 15                                                                                     | 269               |
| Liver metastasis at CRPC (%)             | no    | 253 (95.5)        | 14 (100.0)                                                                             | 239 (95.2)        |
|                                          | yes   | 12 (4.5)          | 0 (0.0)                                                                                | 12 (4.8)          |
|                                          | NA    | 284               | 15                                                                                     | 269               |
| Use of ARPI (%)                          | no    | 202 (41.8)        | 7 (28.0)                                                                               | 195 (43.1)        |
|                                          | yes   | 281 (58.2)        | 18 (72.0)                                                                              | 263 (56.9)        |
|                                          | NA    | 66                | 4                                                                                      | 62                |
| Use of docetaxel (%)                     | no    | 269 (55.7)        | 9 (36.0)                                                                               | 260 (57.1)        |
|                                          | yes   | 214 (44.3)        | 16 (64.0)                                                                              | 198 (42.9)        |
|                                          | NA    | 66                | 4                                                                                      | 62                |
| Use of platinum chemotherapy (%)         | no    | 409 (84.7)        | 17 (68.0)                                                                              | 392 (85.7)        |
|                                          | yes   | 74 (15.3)         | 8 (32.0)                                                                               | 66 (14.3)         |
|                                          | NA    | 66                | 4                                                                                      | 62                |
| Possible NE change (%)                   | no    | 318 (84.8)        | 15 (88.2)                                                                              | 303 (84.8)        |
|                                          | yes   | 57 (15.2)         | 2 (11.8)                                                                               | 55 (15.2)         |
|                                          | NA    | 174               | 12                                                                                     | 162               |

CRPC: castration-resistant prostate cancer; ARPI: androgen receptor pathway inhibitor; NE: neuroendocrine; NA: not available



**Supplementary Table 4 The list of somatic mutations**

| Chromosome | Start     | Reference allele | Alternative allele | Gene         | Transcript | VAF (%) | Variant        | Protein alteration   | Annotation           |
|------------|-----------|------------------|--------------------|--------------|------------|---------|----------------|----------------------|----------------------|
| 13         | 32954272  | -                | A                  | <i>BRCA2</i> | NM_000059  | 35.6    | c.9247dupA     | p.Val3082fs          | frameshift insertion |
| 17         | 41231398  | T                | C                  | <i>BRCA1</i> | NM_007300  | 65.4    | c.A4376G       | p.Gln1459Arg         | nonsynonymous SNV    |
| 16         | 23641023  | A                | C                  | <i>PALB2</i> | NM_024675  | 37.1    | c.T2452G       | p.Phe818Val          | nonsynonymous SNV    |
| 11         | 108218086 | G                | A                  | <i>ATM</i>   | NM_000051  | 18.2    | c.G8665A       | p.Asp2889Asn         | nonsynonymous SNV    |
| 11         | 108115721 | A                | C                  | <i>ATM</i>   | NM_000051  | 14.0    | c.A869C        | p.His290Pro          | nonsynonymous SNV    |
| 11         | 108201068 | G                | -                  | <i>ATM</i>   | NM_000051  | 26.9    | c.7435delG     | p.Glu2479fs          | frameshift deletion  |
| 17         | 7573983   | C                | G                  | <i>TP53</i>  | NM_000546  | 12.6    | c.G1044C       | p.Leu348Phe          | nonsynonymous SNV    |
| 17         | 7578280   | G                | A                  | <i>TP53</i>  | NM_000546  | 33.3    | c.C569T        | p.Pro190Leu          | nonsynonymous SNV    |
| 17         | 7579592   | T                | C                  | <i>TP53</i>  | NM_000546  | 22.5    | c.97-2A>G      |                      | splice-site variant  |
| 17         | 7578446   | -                | G                  | <i>TP53</i>  | NM_000546  | 25.9    | c.483dupC      | p.Ile162fs           | frameshift insertion |
| 17         | 7577609   | C                | G                  | <i>TP53</i>  | NM_000546  | 71.4    | c.673-1G>C     |                      | splice-site variant  |
| 17         | 7577568   | C                | A                  | <i>TP53</i>  | NM_000546  | 22.9    | c.G713T        | p.Cys238Phe          | nonsynonymous SNV    |
| 17         | 7579333   | -                | G                  | <i>TP53</i>  | NM_000546  | 15.7    | c.353dupC      | p.Thr118fs           | frameshift insertion |
| 17         | 7576848   | AGTACC           | -                  | <i>TP53</i>  | NM_000546  | 39.4    | c.993_993del   | p.Gln331fs           | frameshift deletion  |
| 5          | 112175951 | -                | A                  | <i>APC</i>   | NM_000038  | 65.7    | c.4661dupA     | p.Glu1554fs          | frameshift insertion |
| 5          | 112177265 | C                | -                  | <i>APC</i>   | NM_000038  | 10.2    | c.5974delC     | p.Pro1992fs          | frameshift deletion  |
| 5          | 112175970 | A                | -                  | <i>APC</i>   | NM_000038  | 27.2    | c.4679delA     | p.Glu1560fs          | frameshift deletion  |
| 10         | 89690827  | -                | G                  | <i>PTEN</i>  | NM_000314  | 28.1    | c.235dupG      | p.Thr78fs            | frameshift insertion |
| 10         | 89624272  | -                | AA                 | <i>PTEN</i>  | NM_000314  | 15.7    | c.46_47insAA   | p.Tyr16_Gln17delinsX | stop gain            |
| 16         | 68849455  | ACGTAGCAGTG      | -                  | <i>CDH1</i>  | NM_004360  | 22.4    | c.1358_1368del | p.His453fs           | frameshift deletion  |
| 22         | 29115382  | C                | A                  | <i>CHEK2</i> | NM_007194  | 38.7    | c.683+1G>T     |                      | splice-site variant  |
| 2          | 48027319  | A                | G                  | <i>MSH6</i>  | NM_000179  | 11.4    | c.A2197G       | p.Met733Val          | nonsynonymous SNV    |
| 2          | 47705512  | C                | T                  | <i>MSH2</i>  | NM_000251  | 28.5    | c.C2312T       | p.Ala771Val          | nonsynonymous SNV    |

VAF: variant allele frequency; fs: frameshift; \*: stop gain; SNV: single nucleotide variant
